# Supplementary material for: Bromodomain Protein BRD4 Is a Transcriptional Repressor of Autophagy and Lysosomal Function
Source: Mol Cell. 2017 May 18;66(4):517–532.e9. doi: 10.1016/j.molcel.2017.04.027 (PMC5446411; doi:10.1016/j.molcel.2017.04.027)
Supplement: Table S1, Related to STAR Methods. siRNAs Used in the Experiments [file mmc2.xlsx]

## Sheet: Sheet1
Supplemental table 1. siRNAs used in the experiments
siRNA	Company	Cat#/ID
Human BRD4 siRNA #1 (targeting short and long variants)	Ambion	ID: s23901
Human BRD4 siRNA #2 (targeting short and long variants)	Ambion	ID: s23903
Human BRD4 siRNA #3 (targeting short and long variants)	Dharmacon	Cat#: L-004937-09
Human BRD4 siRNA #4 (targeting short and long variants)	QIAGEN	Cat#: SI04235812
Human BRD4 siRNA S (targeting short variant 3’-UTR region)	QIAGEN	Cat#: SI05044865
Human BRD4 siRNA L (targeting long variant)	QIAGEN	Cat#: SI05044872
Human TFEB siRNA	Ambion	ID: s15495
Human TFE3 siRNA	Ambion	ID: s14031
Human MITF siRNA	Ambion	ID: s8790
Human NUT siRNA #1	Ambion	ID: s48802
Human NUT siRNA #2	Ambion	ID: s48803
Human BRD2 siRNA #1	Dharmacon	Cat#: L-004935-07
Human BRD2 siRNA #2	Dharmacon	Cat#: L-004935-09
Human BRD3 siRNA #1	Ambion	ID: s15544
Human BRD3 siRNA #2	Dharmacon	Cat#: L-004936-06
Human CDK9 siRNA	Ambion	ID: s2834
Control siRNA #1	Dharmacon	Cat#: D-001810-03-20
Control siRNA #2	Ambion	Cat#: 4390846
