# Supplementary material for: Bromodomain Protein BRD4 Is a Transcriptional Repressor of Autophagy and Lysosomal Function
Source: Mol Cell. 2017 May 18;66(4):517–532.e9. doi: 10.1016/j.molcel.2017.04.027 (PMC5446411; doi:10.1016/j.molcel.2017.04.027)
Supplement: Table S2, Related to STAR Methods. Primer Sets Used in qPCR Experiments [file mmc3.xlsx]

## Sheet: Sheet1
Supplemental table 2. Primer sets used in qPCR experiments
Primer sets used in RT-qPCR experiments
Gene	Company	Cat#/ID	Sequences
Mouse BRD4	QIAGEN	QT02329040
Human MITF	QIAGEN	QT00037737
Autophagy genes
Human MAP1LC3B	QIAGEN	QT01673007
Human SQSTM1	BIO-RAD	qHsaCED0045925
Human SQSTM1			Fw: TACGACTTGTGTAGCGTCTGC, Rv: GTGTCCGTGTTTCACCTTCC
Human OPTN	QIAGEN	QT00053424
Human ATG2A	QIAGEN	QT00059941
Human ATG9B	QIAGEN	QT00242669
Human ATG16L2	QIAGEN	QT00005915
Human VMP1			Fw: GATTGAAGCCTGCATGTGG, Rv: TGGTTCAGCACCTGAGAGG
Human BECN1	QIAGEN	QT00004221
Human WIPI1	QIAGEN	QT00066458
Human EPG5	QIAGEN	QT00099981
Human PLEKHM1	QIAGEN	QT01681981
Human TECPR1	QIAGEN	QT01340122
Human VPS18	QIAGEN	QT01668940
Human VPS39	QIAGEN	QT00015190
Human VPS41	QIAGEN	QT00028322
Human MAP1LC3C			Fw: GCTGGACAAAACCAAGTTCC, Rv: TTCCGTGGCTCTCAGGAC
Human TECPR2			Fw: ACCAGGCTGGACCTCTCC, Rv: TGTGCTGATTTCCACATGC
Human SEC24D			Fw: TGCCATCTTTTGCACATATCA, Rv: GAGTTGTTGAGAGTATGGGTTTCC
Human PIK3C3	QIAGEN	QT00074004
Lysosome genes
Human GNS			Fw: CCCATTTTGAGAGGTGCCAGT, Rv: TGACGTTACGGCCTTCTCCTT
Human SGSH			Fw: TGACCGGCCTTTCTTCCTCTA, Rv: GCTCTCTCCGTTGCCAAACTT
Human GLA			Fw: AGCCAGATTCCTGCATCAGTG, Rv: ATAACCTGCATCCTTCCAGCC
Human HEXA			Fw: CAACCAACACATTCTTCTCCA, Rv: CGCTATCGTGACCTGCTTTT
Human HEXB	QIAGEN	QT00012054
Human NAGLU			Fw: CAGAAGGAAGGAGCAGGAGT, Rv: ATGTTCCCGAGGCTGTCAC
Human HGNSNAT	QIAGEN	QT01030757
Human TPP1			Fw: GATCCCAGCTCTCCTCAATACG, Rv: GCCATTTTTGCACCGTGTG
Human CLCN7			Fw: TGATCTCCACGTTCACCCTGA, Rv: TCTCCGAGTCAAACCTTCCGA
Human ARSA			Fw: AGAGCTTTGCAGAGCGTTCAG, Rv: ATACGCATGGTCTCAGGTCCA
Human BLOC1S4	QIAGEN	QT01079708
Human CTSB			Fw: AGTGGAGAATGGCACACCCTA, Rv: AAGAAGCCATTGTCACCCCA
Human CTSE	QIAGEN	QT00000903
Human CTSS	QIAGEN	QT00040404
Human NPC1	QIAGEN	QT00066465
Internal controls
Human 18S			Fw: GTAACCCGTTGAACCCCATT, Rv: CCATCCAATCGGTAGTAGCG
Human GAPDH			Fw: GAAGGTGAAGGTCGGAGTC, Rv: GAAGATGGTGATGGGATTTC
Mouse HPRT			Fw: CCTCCTCAGACCGCTTTTT, Rv: AACCTGGTTCATCATCGCTAA
Primer sets used in ChIP-qPCR experiments
Gene	Company	Cat#/ID	Sequences
MAP1LC3B (-0.25 kb)			Fw: TGGAGGGGAAAGGATGGTCGG, Rv: GCTGAGCCACAGGCGGGG
MAP1LC3B (+0.15 kb)			Fw: AGGAGATACAAGGGAAGTGGCT, Rv: TTGAAGGTCTTCTCCGACGGCAT
MAP1LC3B (-0.5 kb)			Fw: TCTTACAGCCACCAGGAGAGTT, Rv: TTTGTCCCGAGCCTTCATTCTG
MAP1LC3B (-0.9 kb)			Fw: ATCGCATGGTGGTTTACGCACT, Rv: AGCCACTAAACTCGCTGGACAA
SQSTM1			Fw: AACTGGGAACTTCTCTGGTGCT, Rv: AAGCTGGCTCTCAGGTTGCTGTT
WIPI1			Fw: TTGCCGGACTGAAACCAGCAGAT, Rv: TAACGCGGCTCTCCATTGGACAAA
BECN1			Fw: CCCGTATCATACCATTCCTAG, Rv: GAAACTCGTGTCCAGTTTCAG
ATG9B	QIAGEN	GPH1025938(-)02A
GNS			Fw: ATCGCGCCTAGGGAGAAA, Rv: AATAAAAAGCCGTGCCTTGA
SGSH			Fw: GCGACCCCGGCCACTGTCCG, Rv: GCCAGGAGACCCCAAGCTGCATC
TPP1			Fw: AGAGGGGTAGTGGTGGTGGAA, Rv: CAGGCTTGGAGTCCCATTCT
CLCN7			Fw: CGTTGCAGGTCACATGGTC, Rv: GGCTGCCCCCGTGTTTGT
a Satellite Repeat	Cell Signaling Technology	#4486
GAPDH Exon 1	Cell Signaling Technology	#5516
